# Supplementary material for: AAA+ protease-adaptor structures reveal altered conformations and ring specialization
Source: PubMed Central journal article supplement (PMC9663308; doi:10.1038/s41594-022-00850-3), 2022-11-03
Supplement: 41594_2022_850_MOESM1_ESM.pdf [file 41594_2022_850_MOESM1_ESM.pdf]

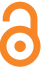

# AAA+ protease-adaptor structures reveal altered conformations and ring specialization

---

In the format provided by the authors and unedited

## SUPPLEMENTARY INFORMATION

**Supplementary Table 1.** Oligonucleotides used in this study.

| Oligonucleotide Name | Purpose                                                           | Oligonucleotide Sequence (5' to 3') |
|----------------------|-------------------------------------------------------------------|-------------------------------------|
| D1 pore-2 QTQ For    | Round-the-horn mutagenesis of QTQClpA                             | CAAGGTGGTCAGGTCGATGCG               |
| D1 pore-2 QTQ Rev    | Round-the-horn mutagenesis of QTQClpA                             | AGTCTGACCCGCACCGATAATGG             |
| D1 pore-2 G For      | Round-the-horn mutagenesis of GGGClpA                             | GGAGGTGGTCAGGTCGATGCG               |
| D1 pore-2 GG Rev     | Round-the-horn mutagenesis of GGGClpA                             | GCCTCCACCCGCACCGATAATGG             |
| D1 pore-2 298 For    | Round-the-horn mutagenesis of $\Delta^{295-297}$ ClpA and KYRClpA | GGTGGTCAGGTCGATGCG                  |
| D1 pore-2 294 Rev    | Round-the-horn mutagenesis of $\Delta^{295-297}$ ClpA             | ACCCGCACCGATAATGG                   |
| D1 pore-2 KYR Rev    | Round-the-horn mutagenesis of KYRClpA                             | ACGATATTTACCCGCACCGATAATGG          |

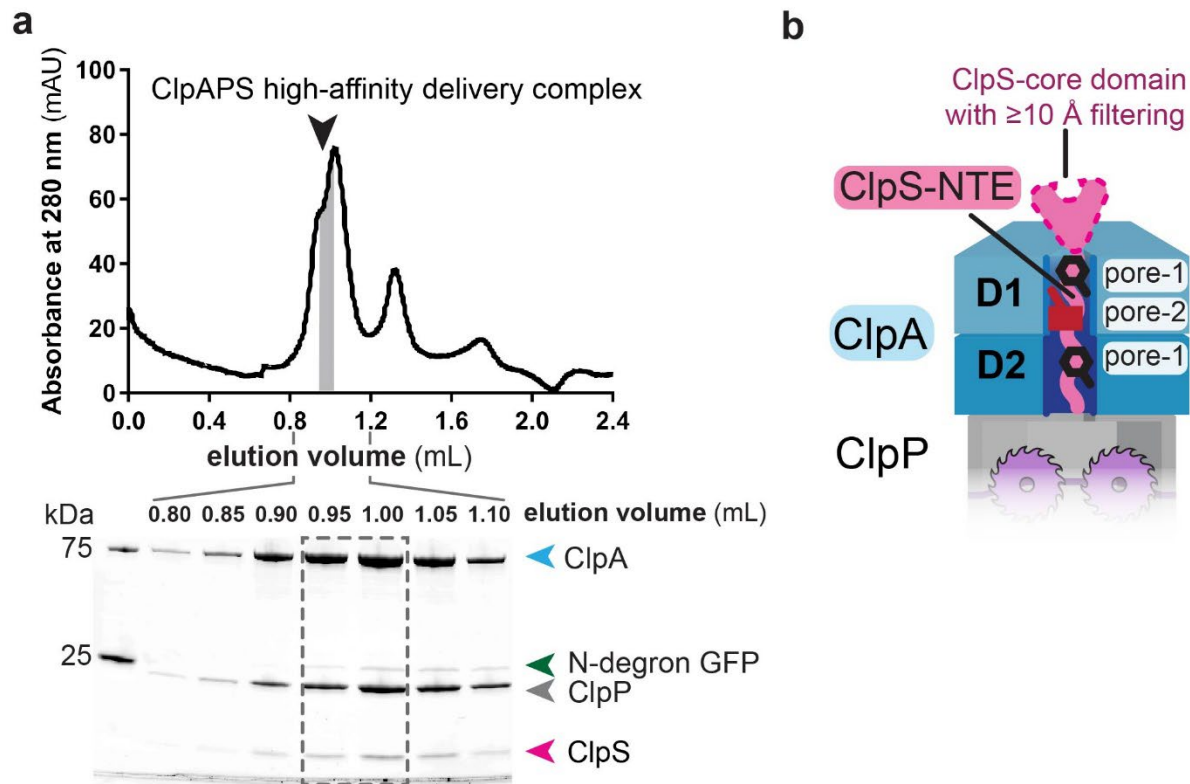

**Supplementary Figure 1. Overview of ClpAPS cryo-EM structural features.**

**a**, Size-exclusion chromatography (top panel) of a complex of ClpA, ClpP, ClpS, and YLFVQELA-GFP (an N-degron substrate) assayed by SDS-PAGE (bottom panel). Gray shaded area and boxed area indicate the fractions pooled for cryo-EM. Preparation of ClpAPS•YLFVQELA-GFP complexes by SEC was performed independently five times (during initial grid screening and optimization); only the shown SEC-purified sample was used to prepare the single grid imaged for data collection. Uncropped gel image at the end of the SI file. **b**, Cartoon of pore loops that interact with the ClpS NTE and proteins resolved in cryo-EM structures.

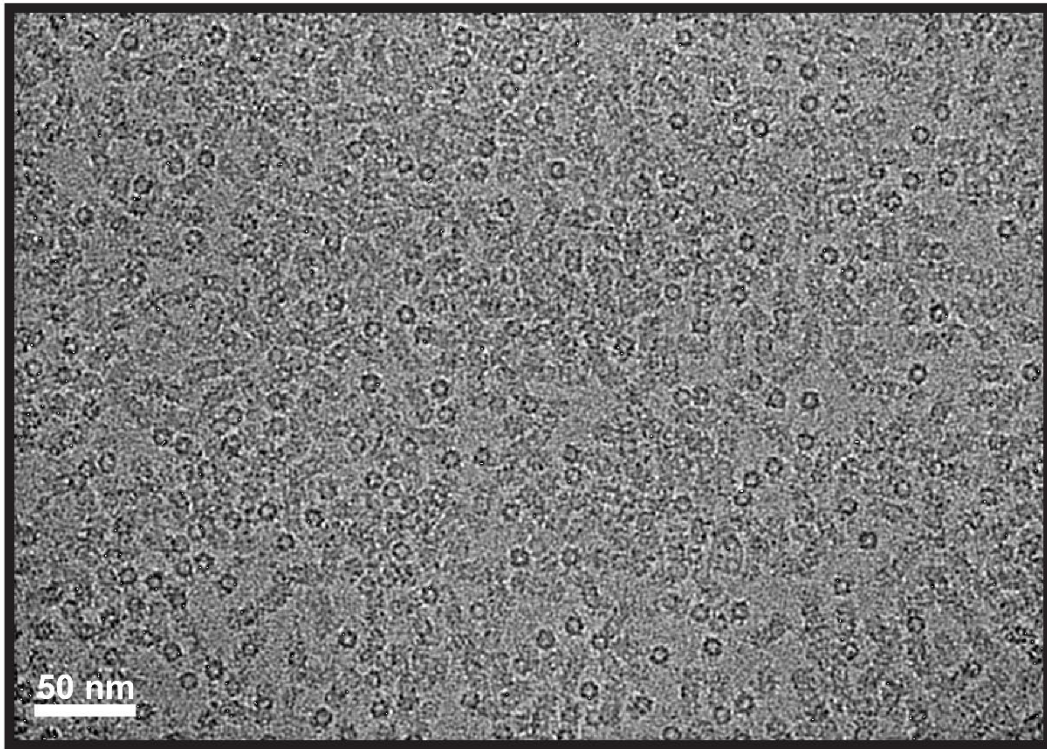

**Supplementary Figure 2. ClpAPS cryo-EM micrograph.**

Representative cryo-EM micrograph of ClpAPS•N-degron GFP complexes from cryo-EM data collection (9,169 micrographs collected total). The scale bar corresponds to 50 nm. The majority of particles are doubly capped with two ClpA<sub>6</sub> molecules per ClpP<sub>14</sub>.

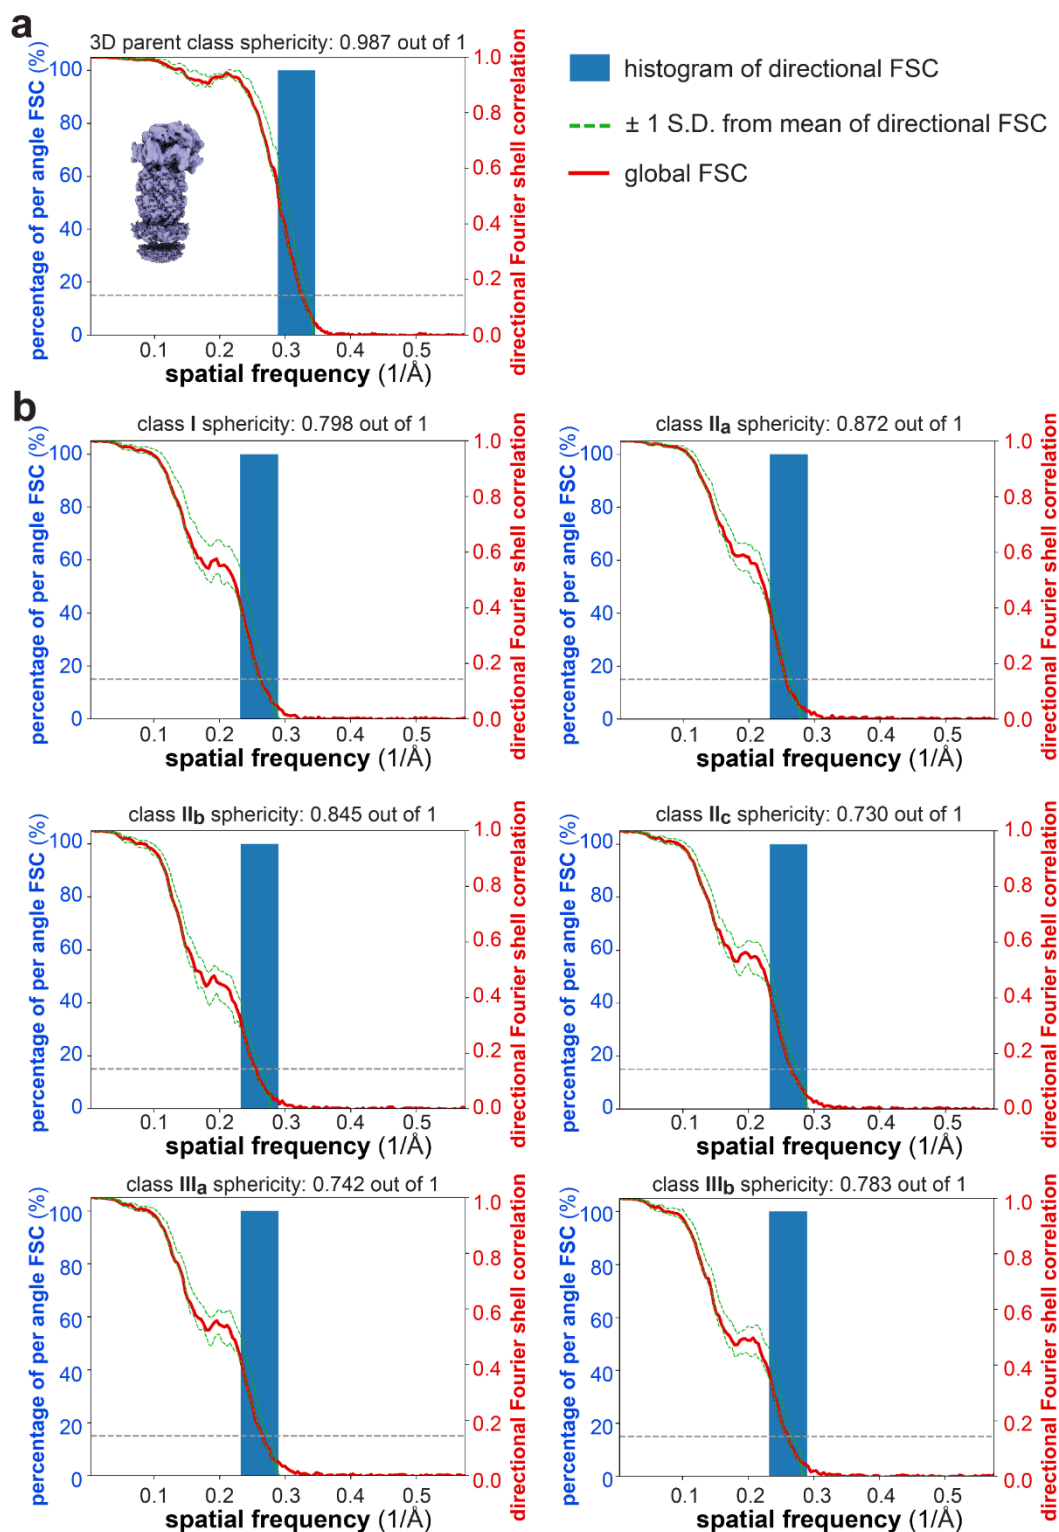

### Supplementary Figure 3. 3DFSC sphericity

3DFSC plots of classes I, II, and III and parent class prior to focused classification. Due to non-uniform box dimensions following density modification, intermediate maps from RELION-3 (from 3D auto-refine) were used as 3DFSC inputs for class I, II, and III structures.

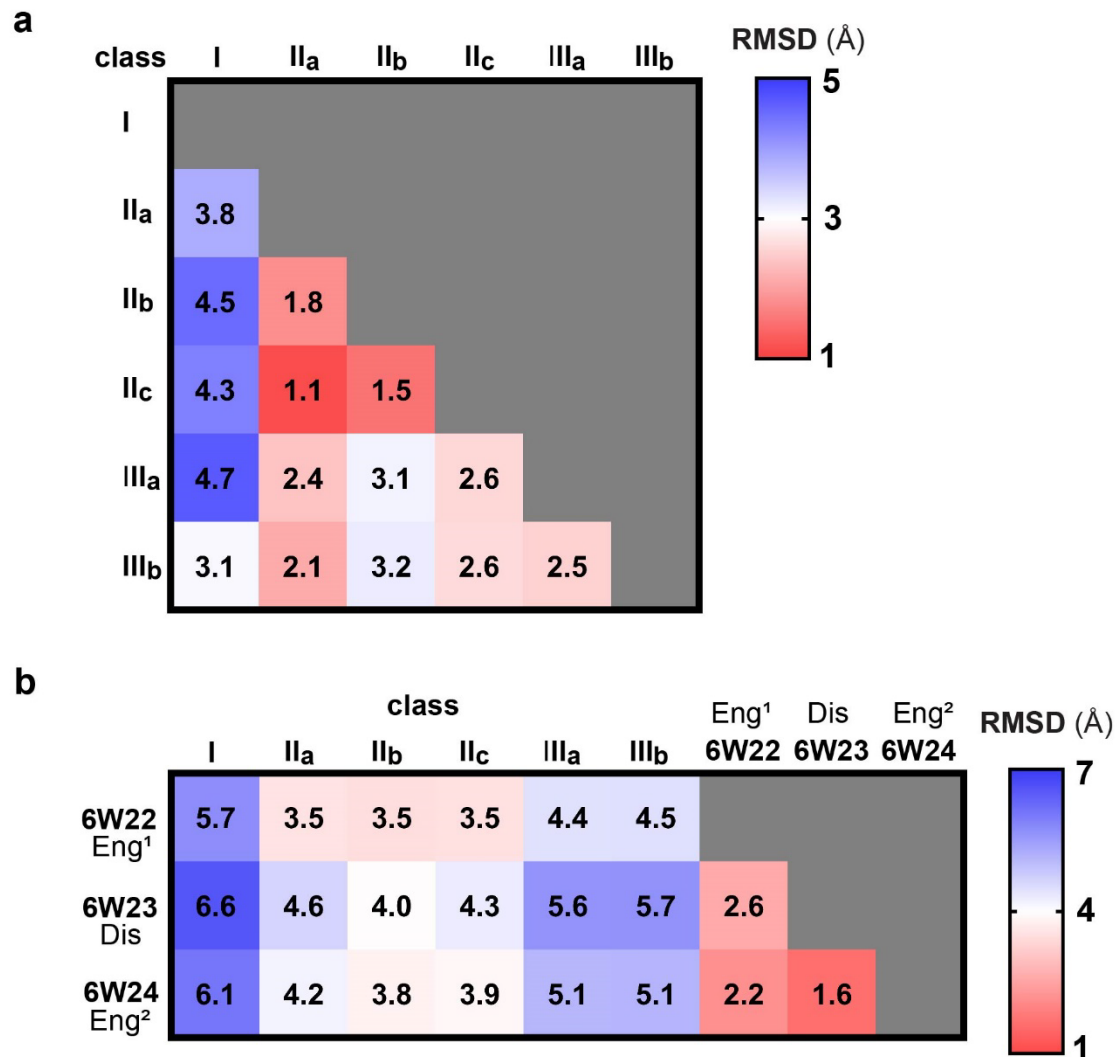

**Supplementary Figure 4. C $\alpha$  RMSD analysis of ClpAP structures.**

**a**, Pairwise RMSD (Å) calculations of class I, II, and III subclasses between ClpA C $\alpha$  atoms in subunits A through F using PyMOL “align”. **b**, Pairwise RMSD comparisons of ClpA C $\alpha$  atoms in ClpAPS cryo-EM structures and ClpAP•RepA-GFP structures (PDB 6W22, 6W23, and 6W24), using PyMOL “align”.

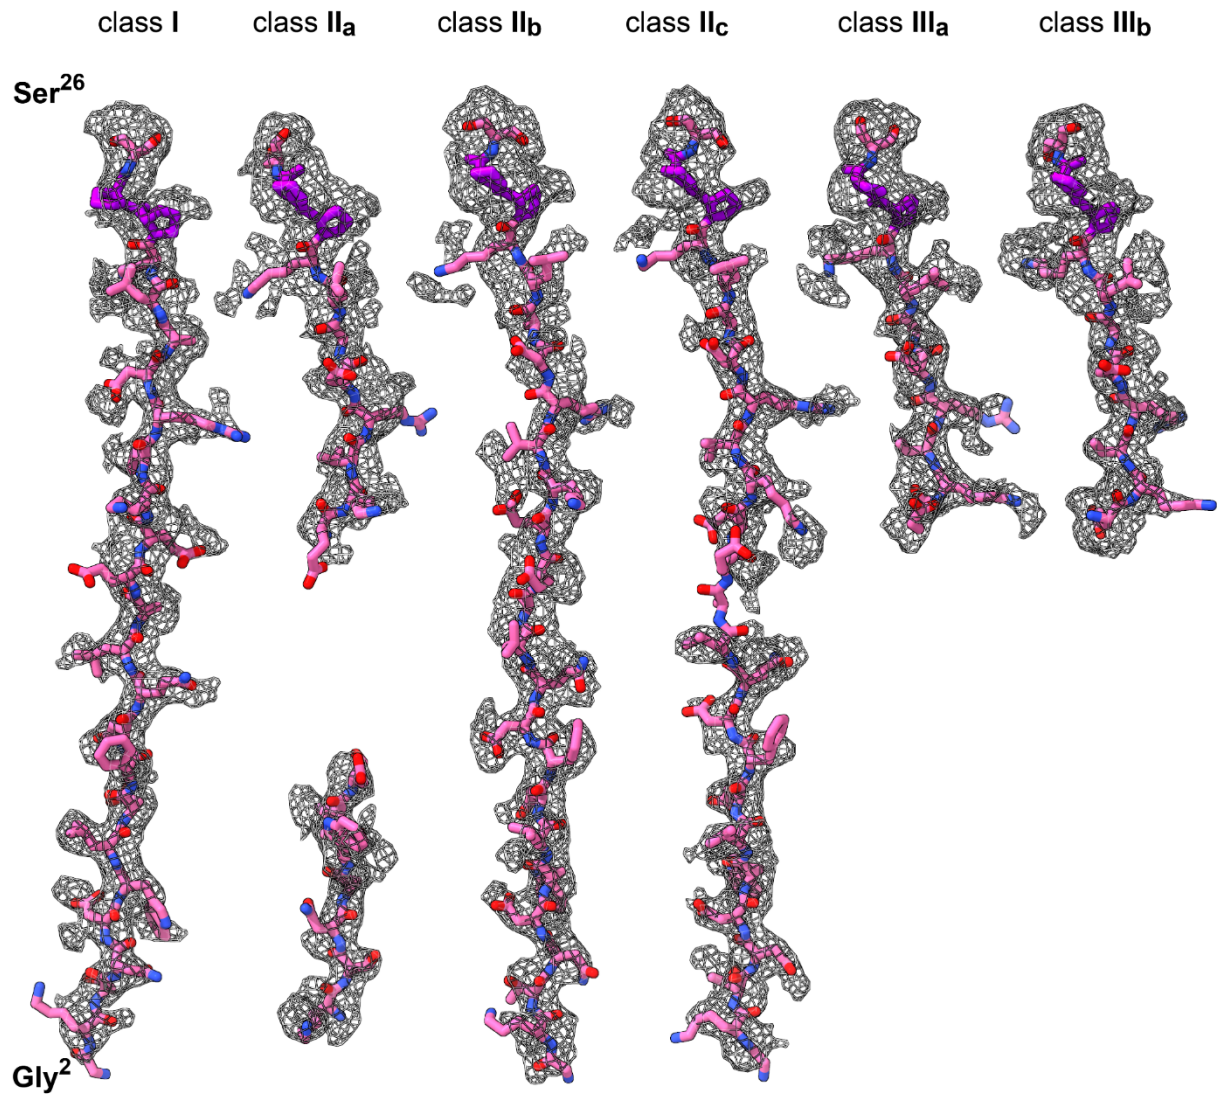

**Supplementary Figure 5. ClpS NTE map-model comparisons.**

ClpS NTE density (mesh at contour level 0.25) and atomic models (shown in sticks) in the ClpA axial channel in classes I, II, and III. The junction sequence residues, Pro<sup>24</sup> and Pro<sup>25</sup>, are colored purple, whereas the rest of the NTE is colored pink.

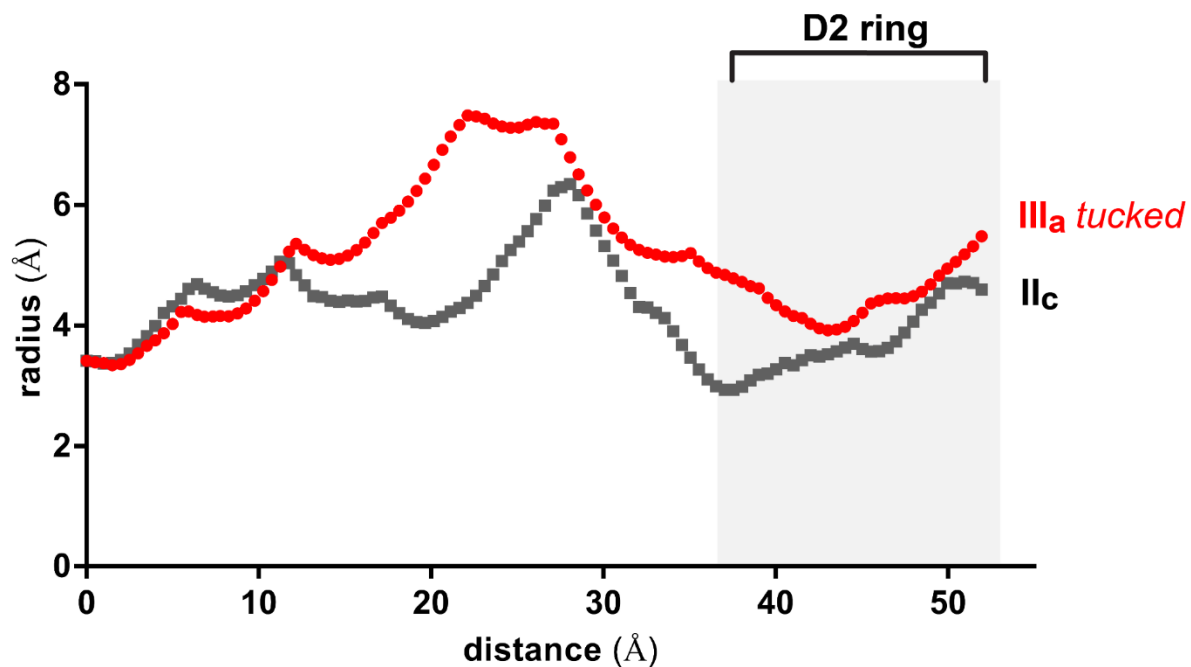

**Supplementary Figure 6. Axial channel radius comparison.** Plot of channel radius vs. channel distance (length of channel from top to bottom of ClpA) calculated by CAVER<sup>1</sup> in class-II<sub>c</sub> (dark gray squares) and class-III<sub>a</sub> (red circles) atomic models. Portion of axial channel in D2 ring is indicated by the light gray box.



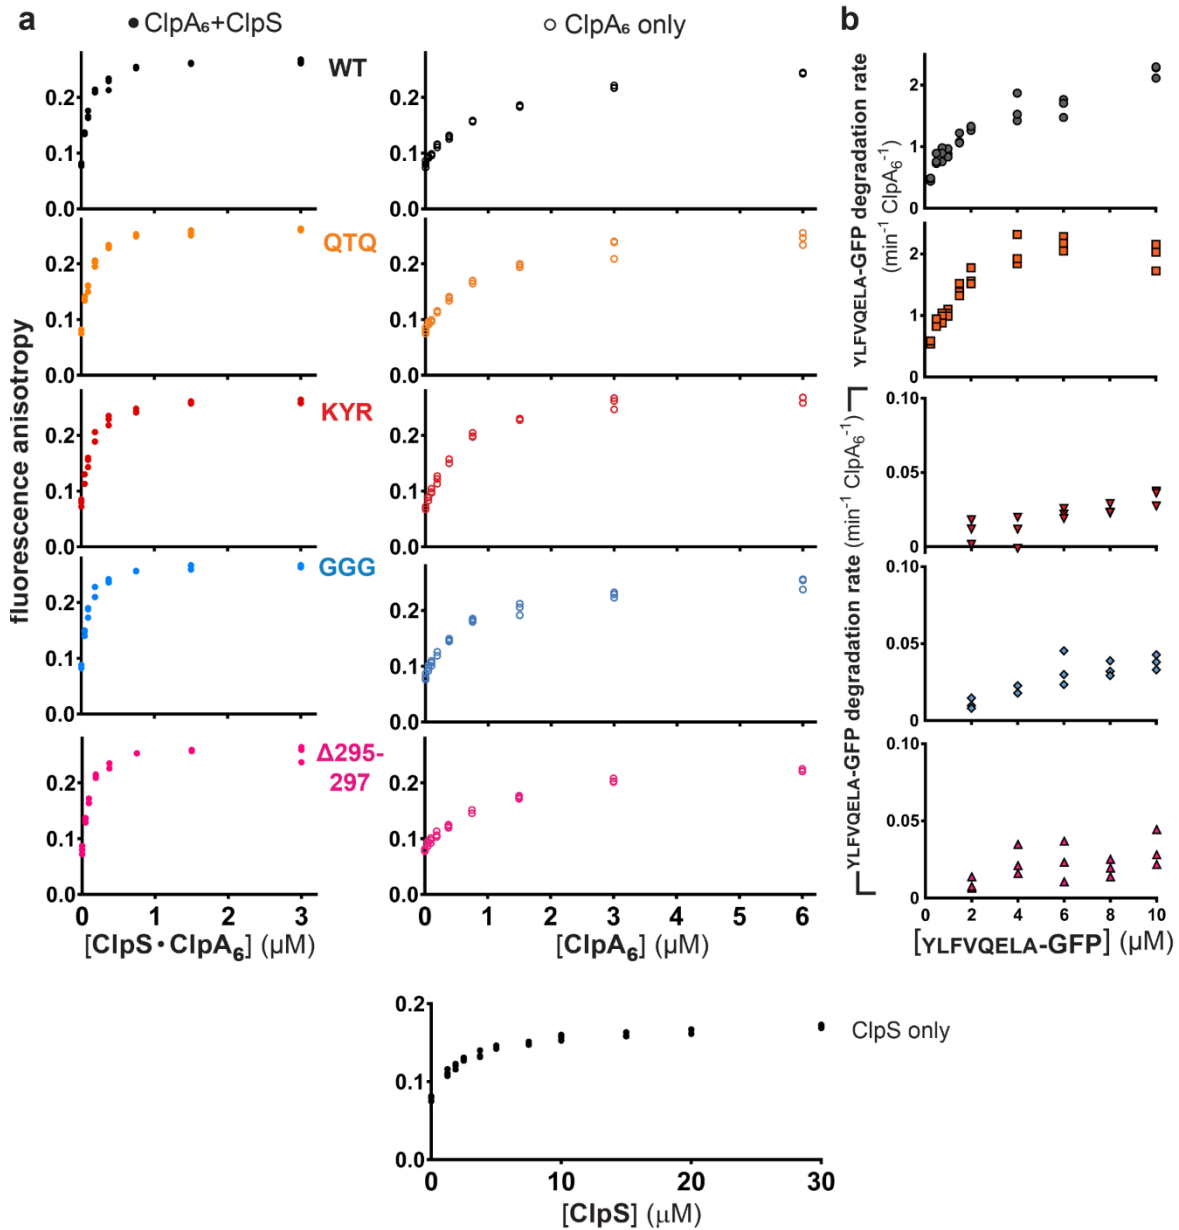

**Supplementary Figure 7. Individual fluorescence anisotropy and YLFVQELA-GFP degradation rate values from Fig. 5a–b.** **a**, Fluorescence anisotropy of ClpA pore-2 variants alone (ClpA<sub>6</sub>, open circles), with an equimolar mixture with ClpS (+ClpS, filled circles), or ClpS only (bottom right panel), titrated in increasing concentrations against a fixed concentration of fluorescein-labeled N-degron peptide. **b**, Kinetic analysis of YLFVQELA-GFP degradation by ClpA D1 pore-2 variants (see *Methods* for concentrations). The graphed y-axis of WT and the KYR variant ranges from 0–2.5 min<sup>-1</sup> ClpA<sub>6</sub><sup>-1</sup>, whereas the y-axis shown for KYR, GGG, and Δ295–297 variants ranges from 0–0.10 min<sup>-1</sup> ClpA<sub>6</sub><sup>-1</sup>.

## **SUPPLEMENTARY REFERENCES**

1. Jurcik, A., Bednar, D., Byska, J., Marques, S. M., Furmanova, K., Daniel, L., Kokkonen, P., Brezovsky, J., Strnad, O., Stourac, J., Pavelka, A., Manak, M., Damborsky, J., & Kozlikova, B. CAVER Analyst 2.0: analysis and visualization of channels and tunnels in protein structures and molecular dynamics trajectories. *Bioinformatics (Oxford, England)*, 34(20), 3586–3588 (2018).

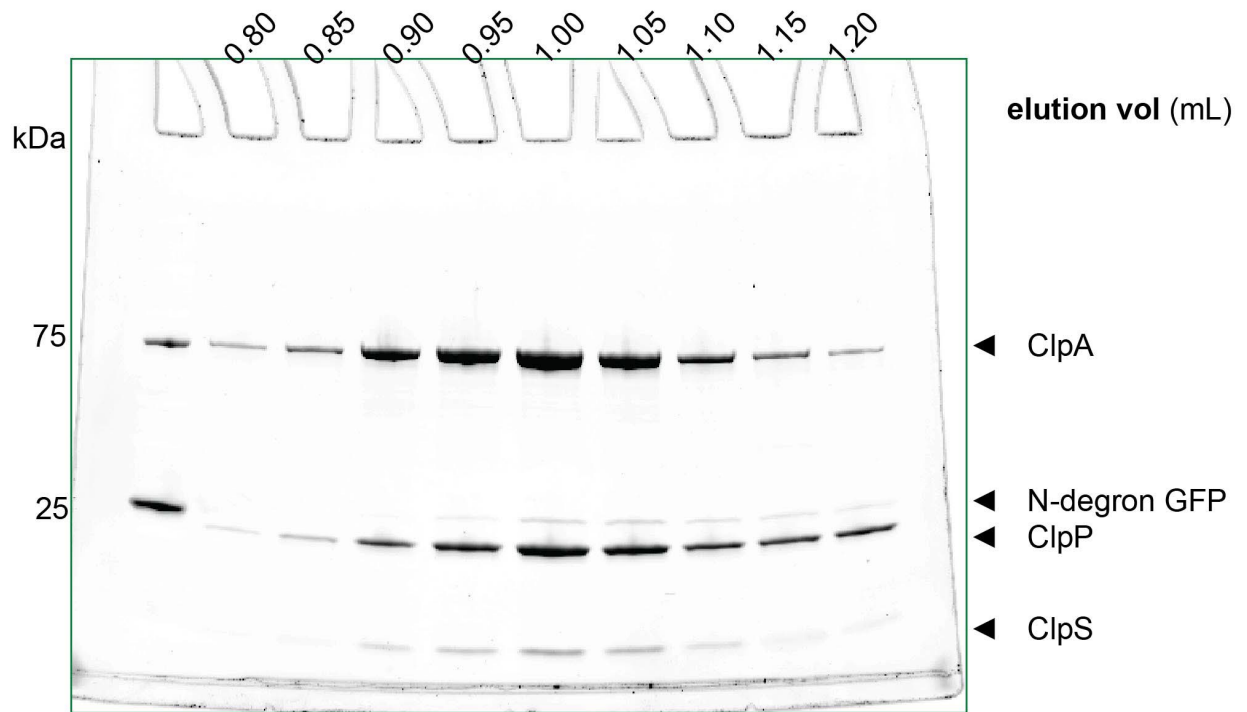

**Unprocessed gel image for Supplementary Fig. 1a.** SDS-PAGE gel (stained with SYPRO Red) of ClpAPS•YLFVQELA-GFP complexes prepared by SEC.
